# Supplementary material for: Conformationally engineering flexible peptides on silver nanoparticles
Source: PubMed Central journal article supplement — iScience. 2022 May 4;25(6):104324. doi: 10.1016/j.isci.2022.104324 (PMC9117549; doi:10.1016/j.isci.2022.104324), 2022-05-04
Supplement: mmc1.pdf [file mmc1.pdf]

**iScience, Volume 25**

**Supplemental information**

**Conformationally engineering flexible peptides  
on silver nanoparticles**

**Jia Xu, Tiange Gao, Lingjie Sheng, Yan Wang, Chenxi Lou, Haifang Wang, Yuanfang Liu, and Aoneng Cao**

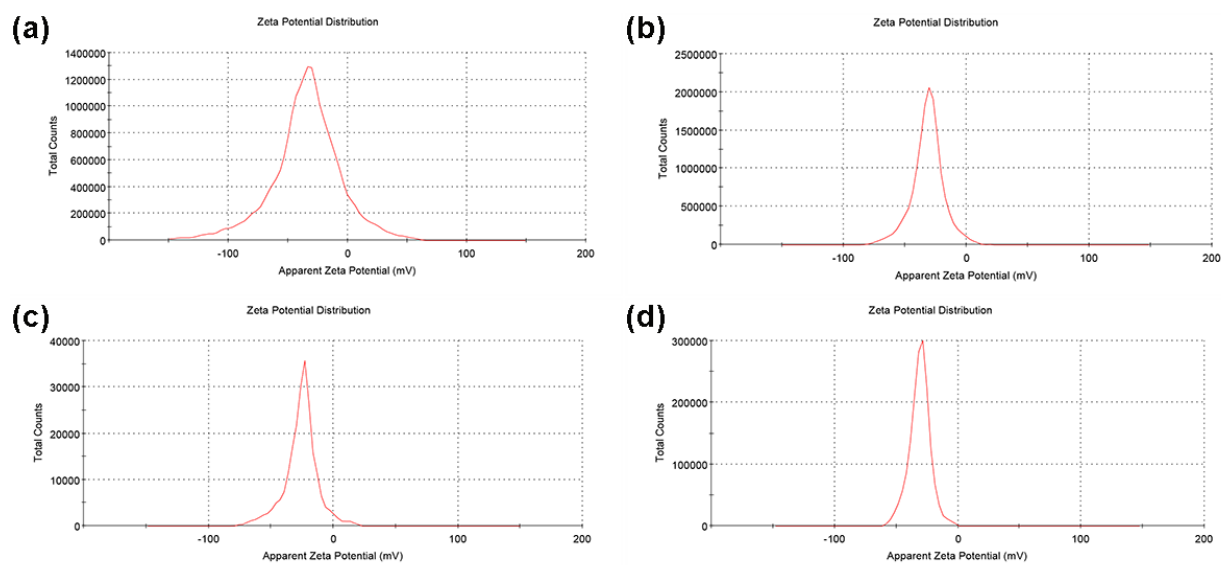

**Figure S1.** Zeta-potentials of AgNPs and the three AgNP-peptide conjugates. Related to STAR Methods. (a) AgNPs, (b) AgNP-P1, (c) AgNP-P1m, and (d) AgNP-P1s.

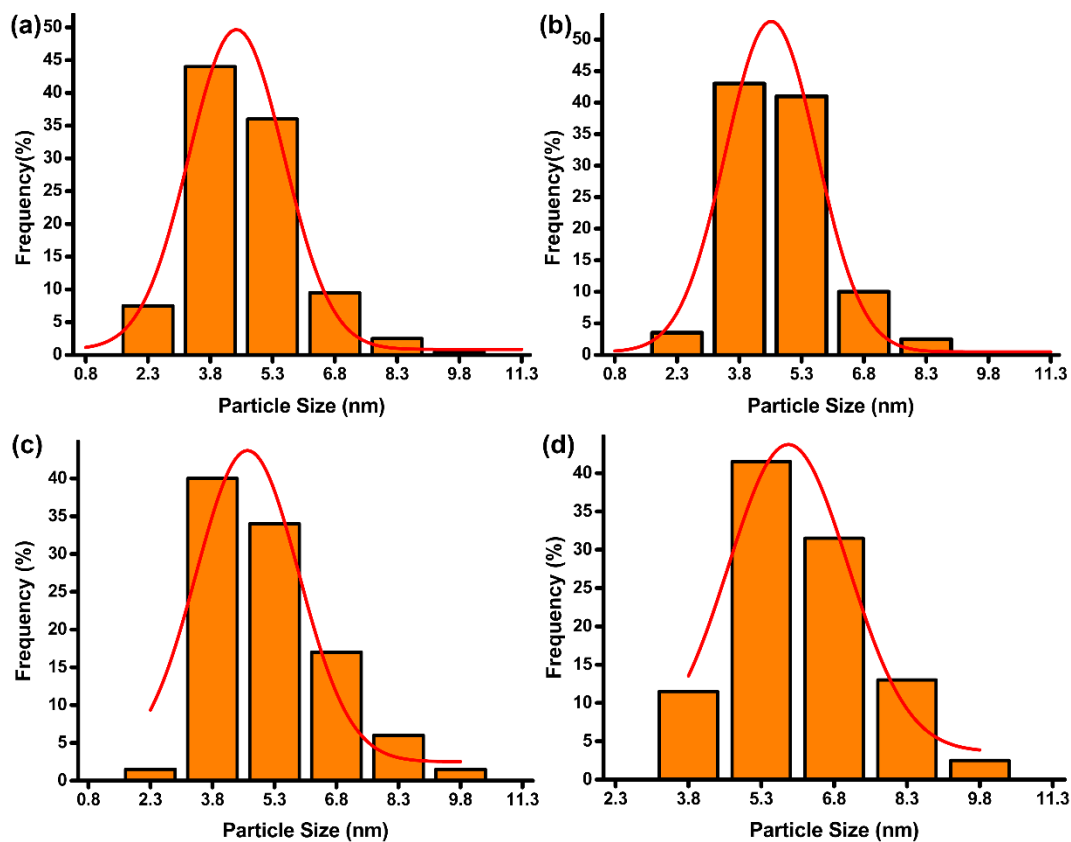

**Figure S2.** Size distributions of AgNPs and the three AgNP-peptide conjugates. Related to Figure 2. (a) AgNPs:  $4.43 \pm 1.14$  nm, (b) AgNP-P1:  $4.57 \pm 1.10$  nm, (c) AgNP-P1m:  $4.60 \pm 1.24$  nm and (d) AgNP-P1s:  $5.81 \pm 1.23$  nm.

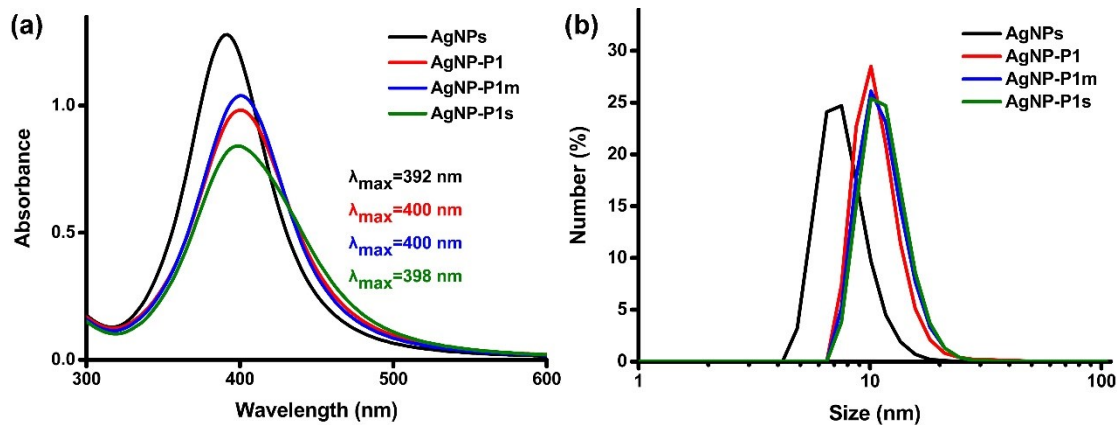

**Figure S3.** Spectral shift and hydrodynamic diameter change of AgNPs after peptide conjugation. Related to Figure 2.

(a) UV-Vis spectra of AgNPs and the three AgNP-peptide conjugates. (b) Hydrodynamic diameter distributions of AgNPs and the three AgNP-peptide conjugates as measured by DLS. The increased hydrodynamic diameters indicate the successful conjugation of peptides on AgNPs.

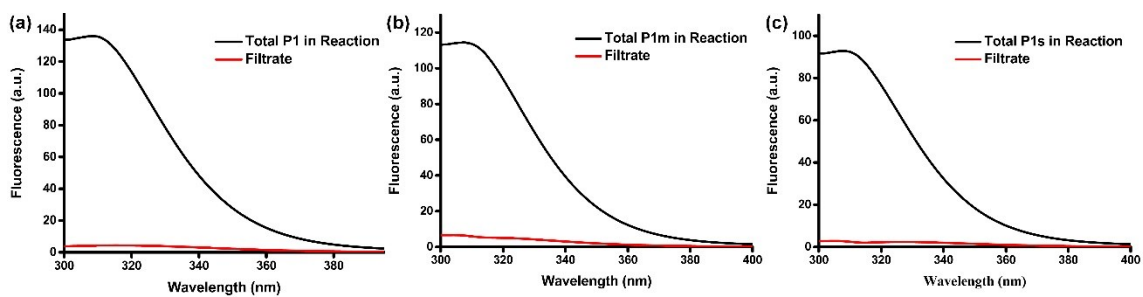

**Figure S4.** The efficiency of the peptide conjugation onto AgNPs (the molar ratio of peptide/AgNP is 120:1) as determined by fluorescence of peptides. Related to Figure 3.

(a) P1, (b) P1m, (c) P1s. The near-zero signals of the unreacted peptides (red lines) indicate nearly complete conjugation of P1, P1m and P1s onto AgNPs.

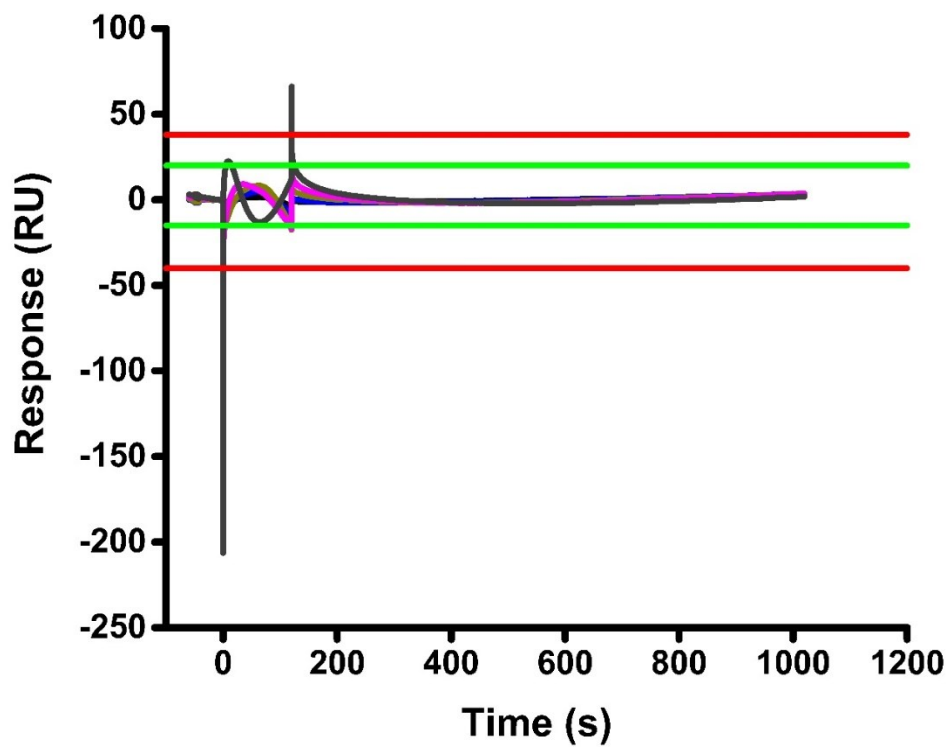

**Figure S5.** Residue plot for the kinetics of AgNP-P1 binding to the immobilized HEWL (the U-value is 1). The green lines indicate the 95% confidence interval, and the red lines indicate the 90% confidence interval. Related to Figure 4b.

**Table S1.** The Ag contents of the as-prepared AgNP solutions determined by AAS. Related to STAR Methods

| Element | Batch 1 (mg.L <sup>-1</sup> ) | Batch 2 (mg.L <sup>-1</sup> ) | Batch 3 (mg.L <sup>-1</sup> ) | Average (mg.L <sup>-1</sup> ) |
|---------|-------------------------------|-------------------------------|-------------------------------|-------------------------------|
| Ag      | 30.15                         | 30.48                         | 30.44                         | 30.4±0.2                      |
